# Supplementary material for: Randomized Clinical Trial of Real-Time fMRI Amygdala Neurofeedback for Major Depressive Disorder: Effects on Symptoms and Autobiographical Memory Recall
Source: Atypon-hosted journal article supplement (doi:10.1176/appi.ajp.2017.16060637), 2017-04-14
Supplement: appi.ajp.2017.16060637.ds001.pdf [file appi.ajp.2017.16060637.ds001.pdf]

 


Psychiatry Online
